# Supplementary material for: Relating Global and Local Connectome Changes to Dementia and Targeted Gene Expression in Alzheimer’s Disease
Source: bioRxiv or medRxiv preprint supplement (doi:10.1101/730416), 2021-09-03
Supplement: Supplementary file [file media-1.pdf]

# **Supplementary Materials for: Relating Global and Local Connectome Changes to Dementia and Targeted Gene Expressions in Alzheimer's Disease**

**Samar S. M. Elsheikh, Emile R. Chimusa, Nicola J. Mulder and Alessandro Crimi**

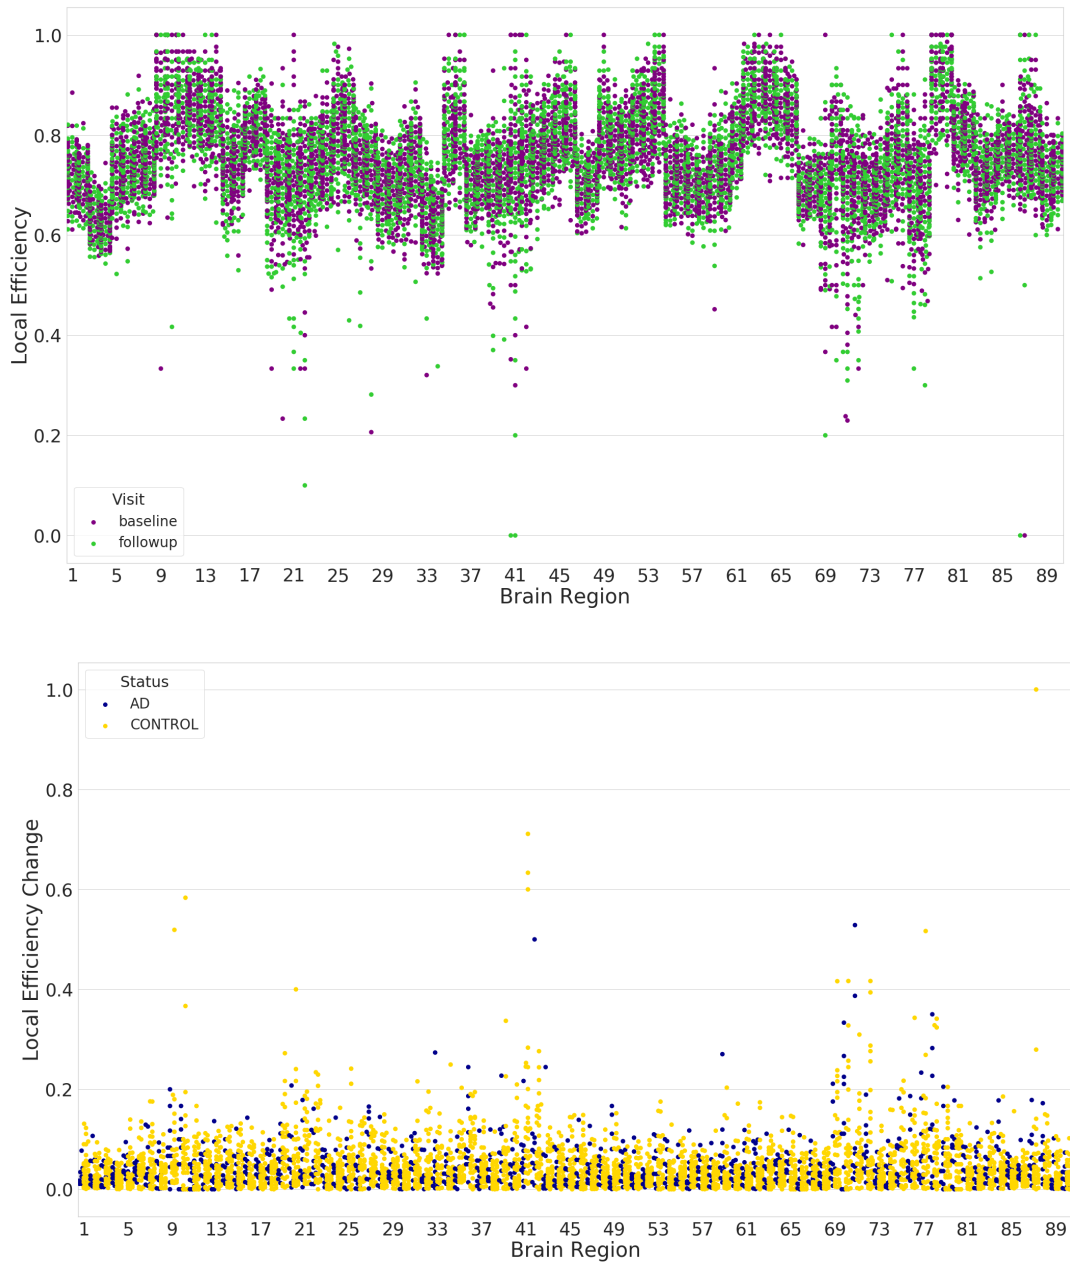

**Figure S1.** The top figure shows the distribution of local efficiency along the 90 AAL brain regions in the baseline (purple) vs in the follow-up (green). The bottom figure shows the distribution of the differences between the baseline and follow-up measures of local efficiency of the AD (blue) vs controls (yellow), along the 90 AAL brain regions.

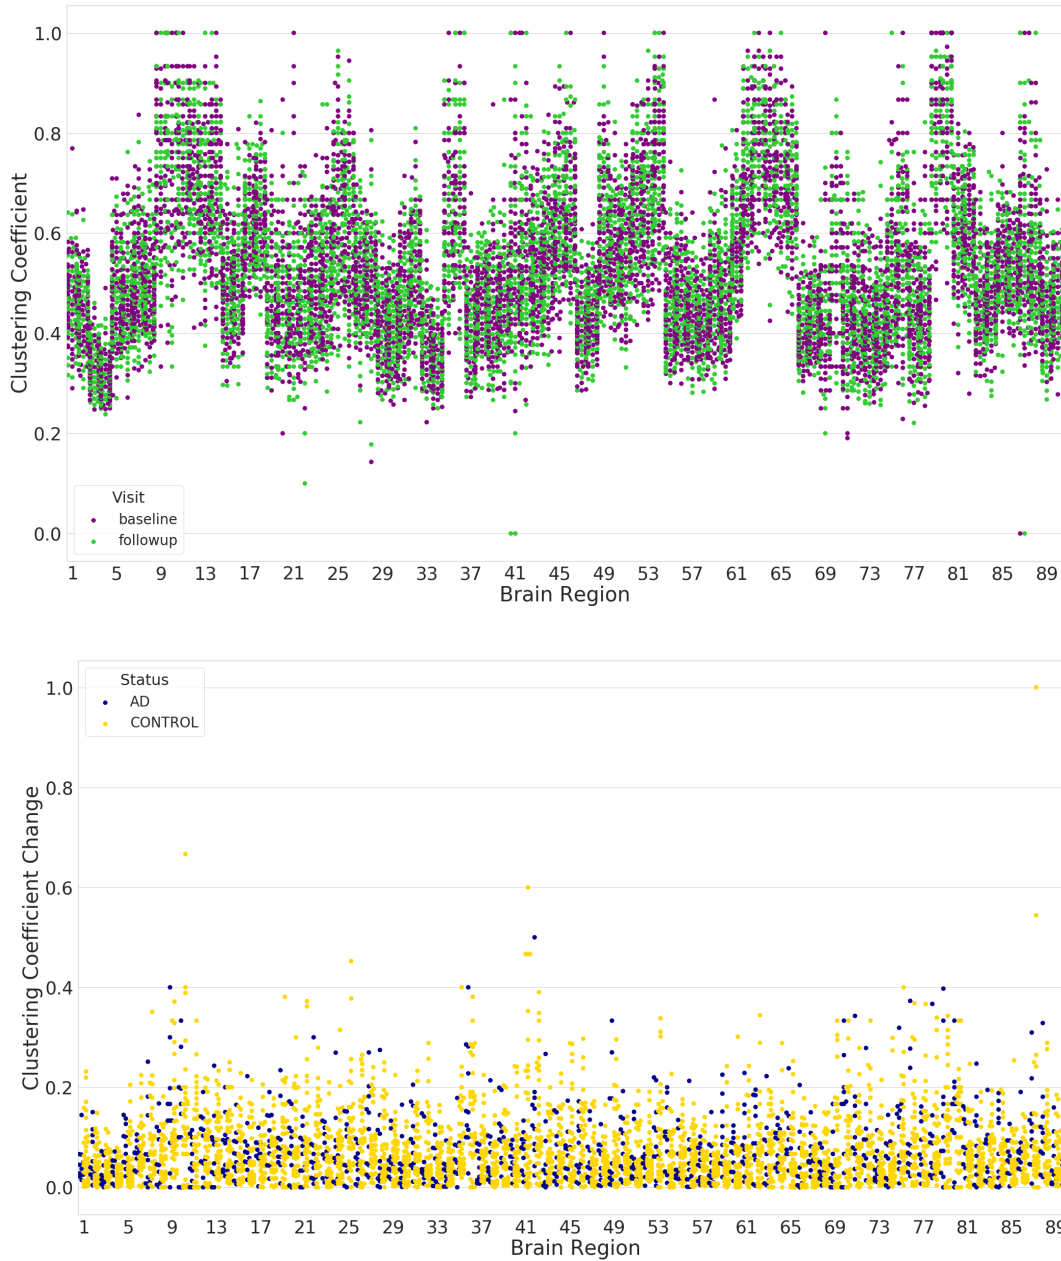

**Figure S2.** The top figure shows the distribution of clustering coefficient along the 90 AAL brain regions in the baseline (purple) vs in the follow-up (green). The bottom figure shows the distribution of the differences between the baseline and follow-up measures of clustering coefficient of the AD (blue) vs controls (yellow), along the 90 AAL brain regions.

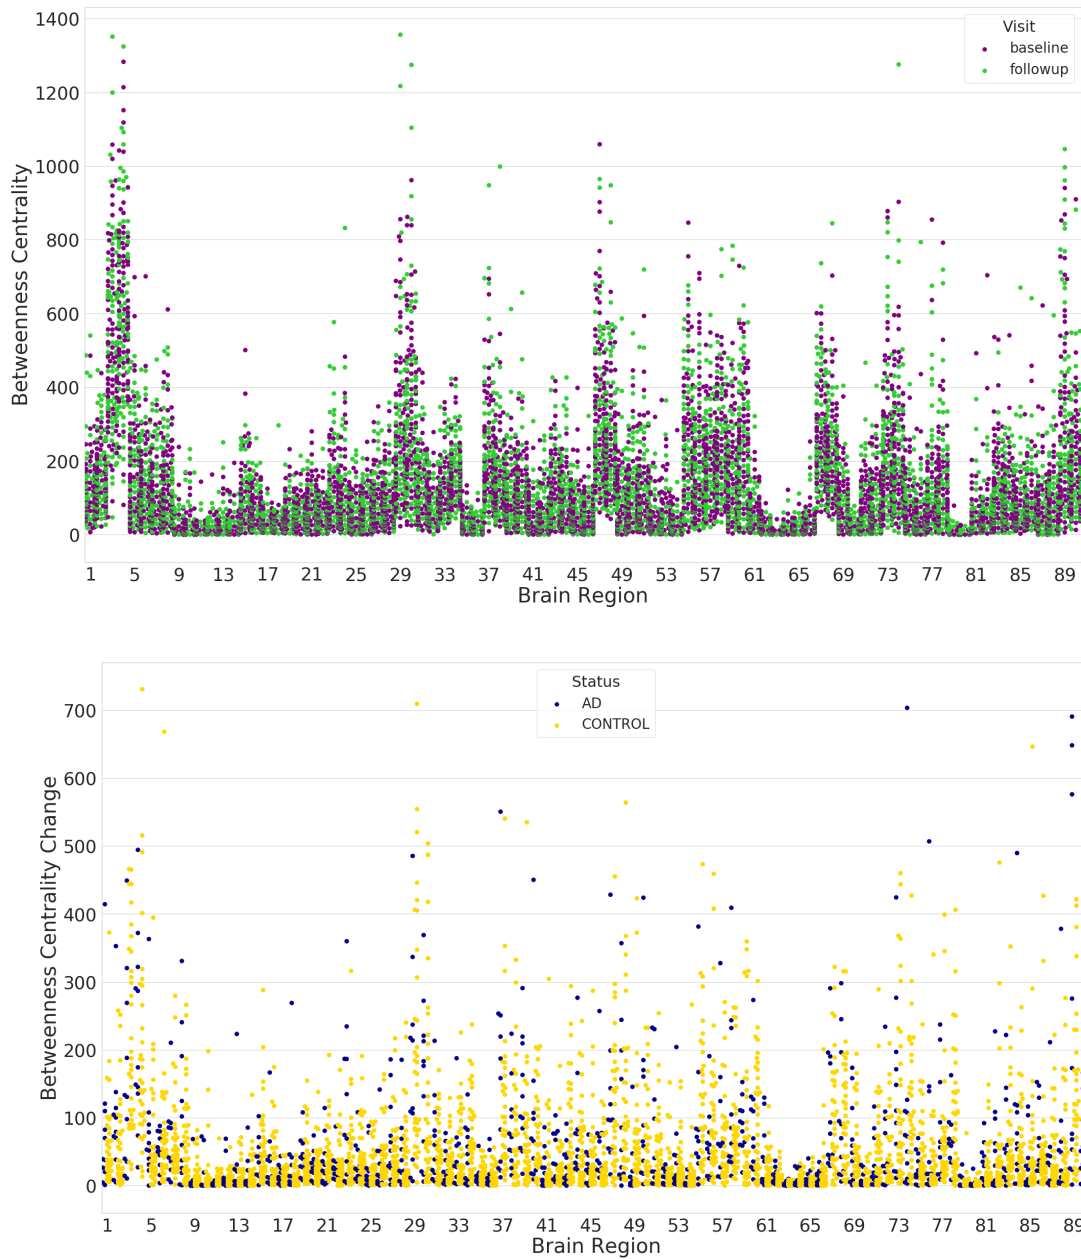

**Figure S3.** The top figure shows the distribution of betweenness centrality along the 90 AAL brain regions in the baseline (purple) vs in the follow-up (green). The bottom figure shows the distribution of the differences between the baseline and follow-up measures of betweenness centrality of the AD (blue) vs controls (yellow), along the 90 AAL brain regions.

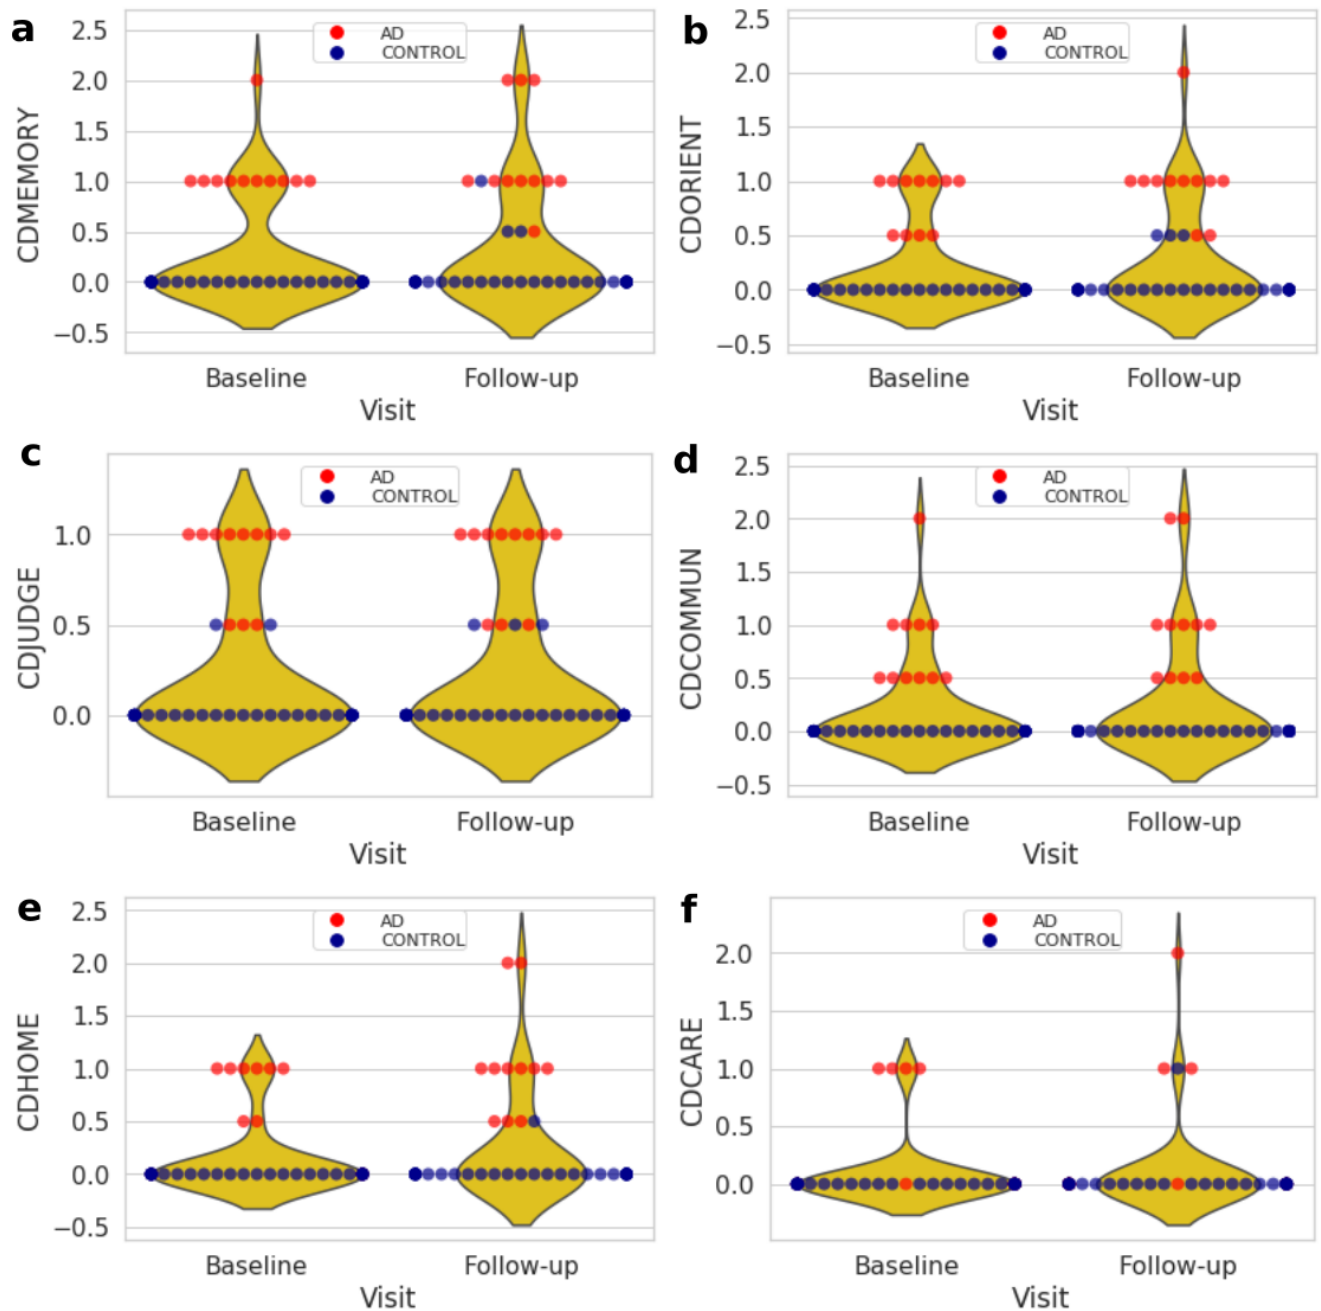

**Figure S4.** Violin plots to illustrate the CDR scores (either 0: None, 0.5: very mild, 1: mild, 2: moderate or 3: severe) in the baseline (left violin plot) and follow-up (right violin plot) visits, for AD (red dots) and controls (blue dots). The memory (CDMEMORY; a) and orientation (CDORIENT; b) scores are represented by the top sub-figures, judgment and problem solving (CDJUDGE; c) and community affairs (CDCOMMUN; d) are the middle sub-figures, while home and hobbies (CDHOME; e) and personal care (CDCARE; f) are at the bottom. It is visible that generally some AD subjects worsen their score, except for the CDCARE score where few improved as a result to finding strategies after the diagnosis at baseline.

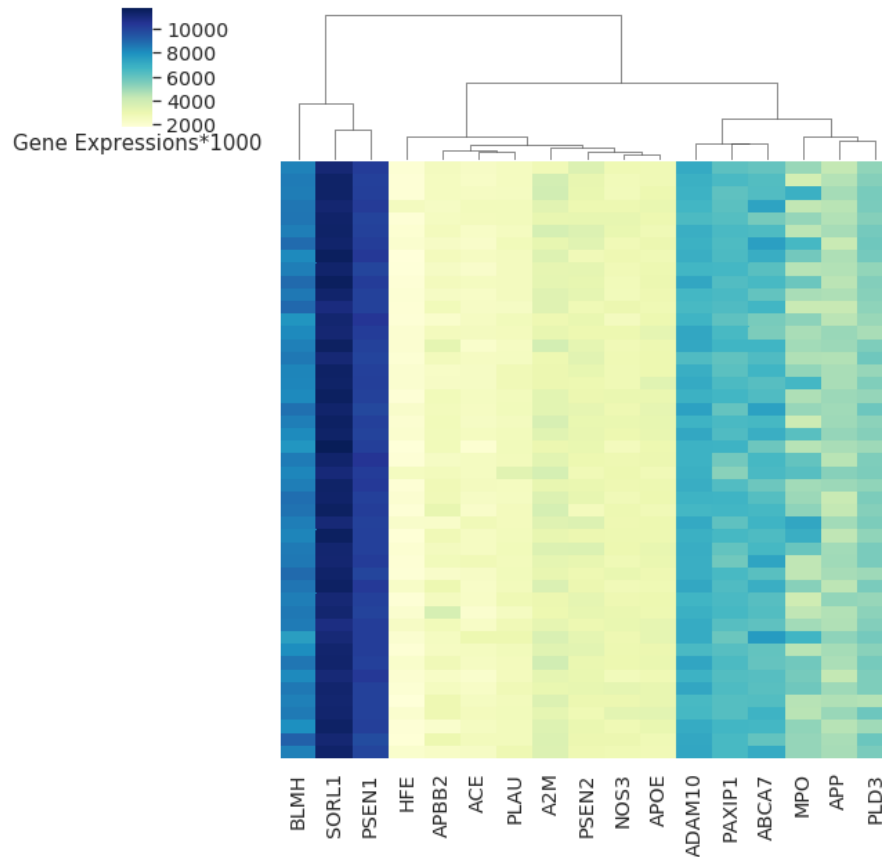

**Figure S5.** A heatmap of the estimated 17 gene expression profiles (values multiplied by 1000, each line represents a participant) out of the 65 probe sets as explained in the Materials and Methods section. The dark blue represents a high expression values, while the yellow represents low expression. The SORL1 has the highest expression among the genes and HFE expression was the lowest among other genes.

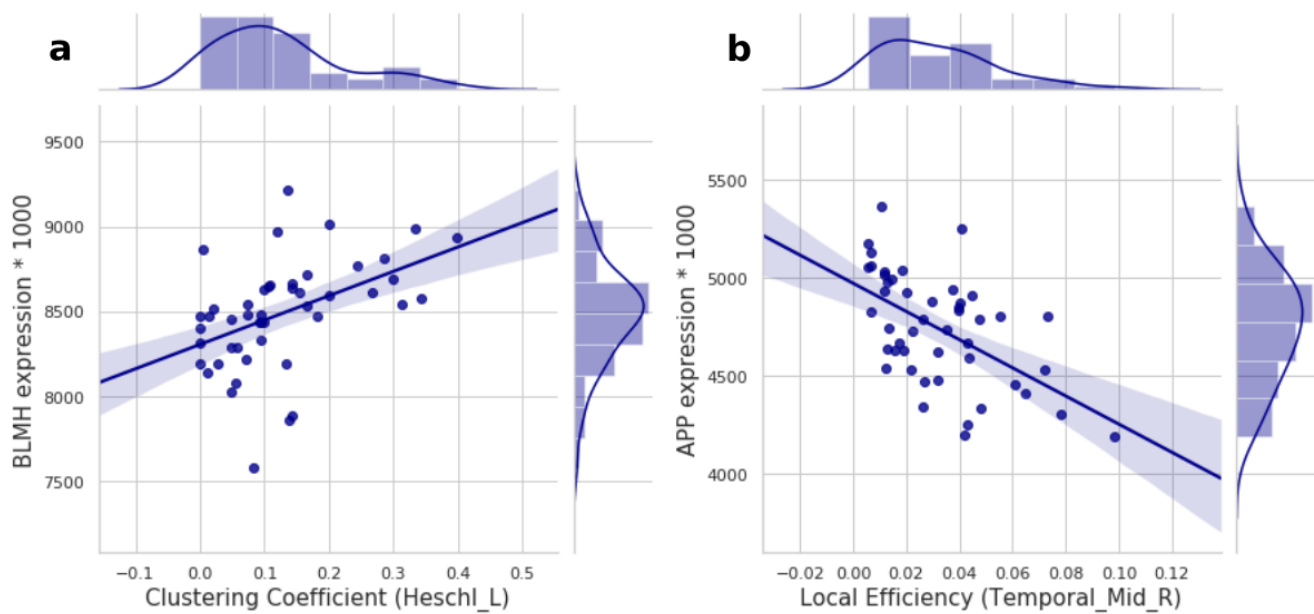

**Figure S6.** A scatter plot of all the significant association results. The plots shows the associations between; (a) BLMH expression and clustering coefficient in AAL region 79 (Heschl\_L), (b) APP expression and local efficiency in brain region 86 (Temporal\_Mid\_R).

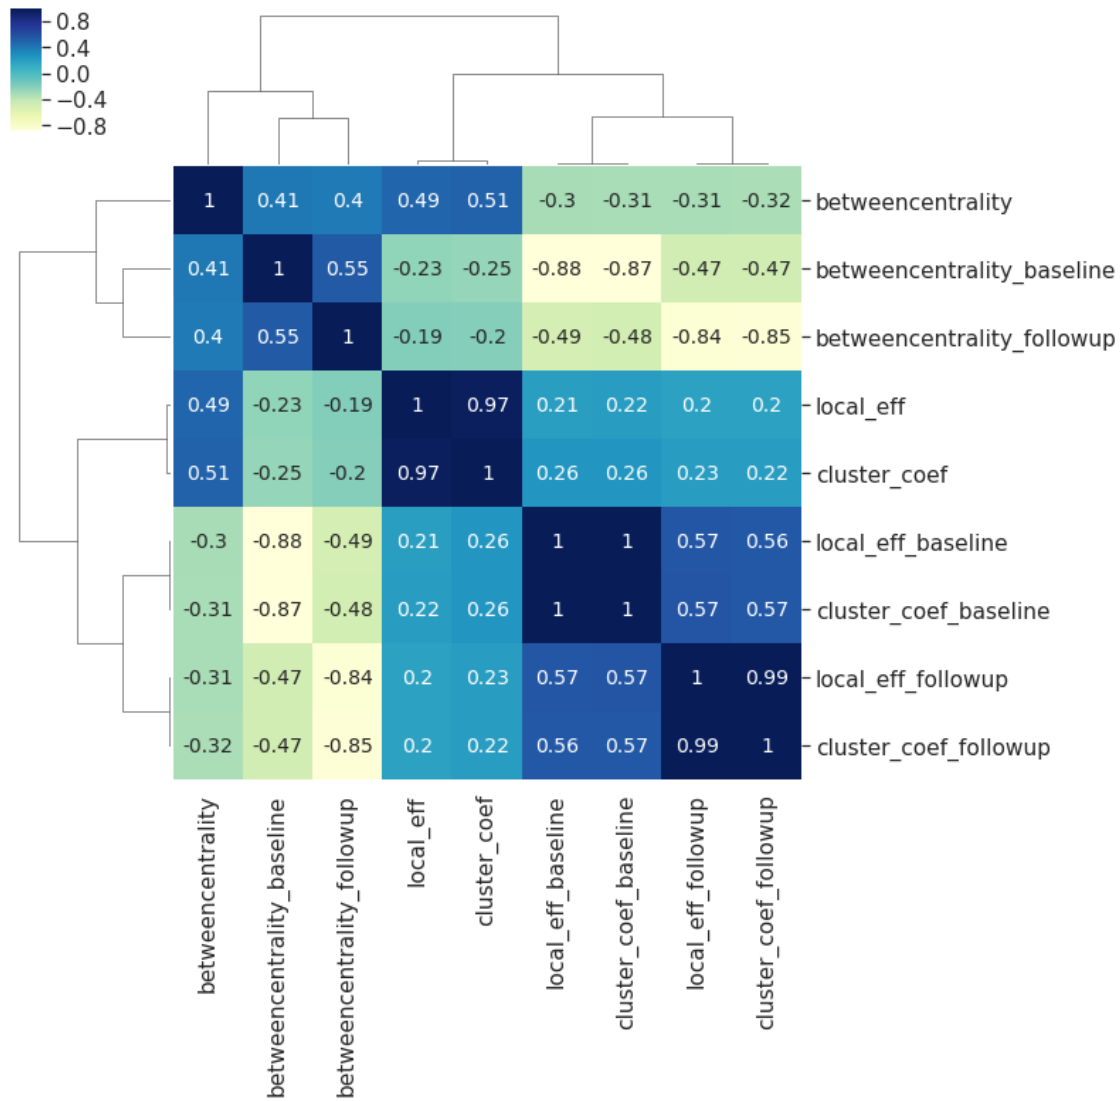

**Figure S7.** Spearman correlations between the three local connectivity metrics; local efficiency, clustering coefficient and betweenness centrality, at baseline (suffix: \_baseline), follow-up (suffix: \_followup) and the absolute difference between them (no suffix). The calculation of Spearman's coefficient combines all 90 brain regions. The plot illustrates the very strong relationship between the clustering coefficient and local efficiency at baseline, follow-up and the absolute difference between the two visits.



**Table S1.** Full names of brain AAL atlas regions.

| <b>Regions</b>              | <b>Regions</b>                            | <b>abbr.</b> | <b>regionLabels</b> |
|-----------------------------|-------------------------------------------|--------------|---------------------|
| <b>Precentral_L</b>         | Precentral gyrus                          | PreCG.L      | region1             |
| <b>Precentral_R</b>         | Precentral gyrus                          | PreCG.R      | region2             |
| <b>Frontal_Sup_L</b>        | Superior frontal gyrus;dorsolateral       | SFGdor.L     | region3             |
| <b>Frontal_Sup_R</b>        | Superior frontal gyrus;dorsolateral       | SFGdor.R     | region4             |
| <b>Frontal_Sup_Orb_L</b>    | Superior frontal gyrus; orbital part      | ORBsup.L     | region5             |
| <b>Frontal_Sup_Orb_R</b>    | Superior frontal gyrus; orbital part      | ORBsup.R     | region6             |
| <b>Frontal_Mid_L</b>        | Middle frontal gyrus                      | MFG.L        | region7             |
| <b>Frontal_Mid_R</b>        | Middle frontal gyrus                      | MFG.R        | region8             |
| <b>Frontal_Mid_Orb_L</b>    | Middle frontal gyrus; orbital part        | ORBmid.L     | region9             |
| <b>Frontal_Mid_Orb_R</b>    | Middle frontal gyrus; orbital part        | ORBmid.R     | region10            |
| <b>Frontal_Inf_Oper_L</b>   | Inferior frontal gyrus;opercular part     | IFGoperc.L   | region11            |
| <b>Frontal_Inf_Oper_R</b>   | Inferior frontal gyrus;opercular part     | IFGoperc.R   | region12            |
| <b>Frontal_Inf_Tri_L</b>    | Inferior frontal gyrus;triangular part    | IFGtriang.L  | region13            |
| <b>Frontal_Inf_Tri_R</b>    | Inferior frontal gyrus;triangular part    | IFGtriang.R  | region14            |
| <b>Frontal_Inf_Orb_L</b>    | Inferior frontal gyrus; orbitalpart       | ORBinf.L     | region15            |
| <b>Frontal_Inf_Orb_R</b>    | Inferior frontal gyrus; orbitalpart       | ORBinf.R     | region16            |
| <b>Rolandic_Oper_L</b>      | Rolandic operculum                        | ROL.L        | region17            |
| <b>Rolandic_Oper_R</b>      | Rolandic operculum                        | ROL.R        | region18            |
| <b>Supp_Motor_Area_L</b>    | Supplementary motor area                  | SMA.L        | region19            |
| <b>Supp_Motor_Area_R</b>    | Supplementary motor area                  | SMA.R        | region20            |
| <b>Olfactory_L</b>          | Olfactory cortex                          | OLF.L        | region21            |
| <b>Olfactory_R</b>          | Olfactory cortex                          | OLF.R        | region22            |
| <b>Frontal_Sup_Medial_L</b> | Superior frontal gyrus; medial            | SFGmed.L     | region23            |
| <b>Frontal_Sup_Medial_R</b> | Superior frontal gyrus; medial            | SFGmed.R     | region24            |
| <b>Frontal_Mid_Orb_L</b>    | Superior frontal gyrus; medial orbital    | ORBsupmed.L  | region25            |
| <b>Frontal_Mid_Orb_R</b>    | Superior frontal gyrus; medial orbital    | ORBsupmed.R  | region26            |
| <b>Rectus_L</b>             | Gyrus rectus                              | REC.L        | region27            |
| <b>Rectus_R</b>             | Gyrus rectus                              | REC.R        | region28            |
| <b>Insula_L</b>             | Insula                                    | INS.L        | region29            |
| <b>Insula_R</b>             | Insula                                    | INS.R        | region30            |
| <b>Cingulum_Ant_L</b>       | Anterior cingulate and paracingulate gyri | ACG.L        | region31            |
| <b>Cingulum_Ant_R</b>       | Anterior cingulate and paracingulate gyri | ACG.R        | region32            |
| <b>Cingulum_Mid_L</b>       | Median cingulate and paracingulate gyri   | DCG.L        | region33            |
| <b>Cingulum_Mid_R</b>       | Median cingulate and paracingulate gyri   | DCG.R        | region34            |
| <b>Cingulum_Post_L</b>      | Posterior cingulate gyrus                 | PCG.L        | region35            |
| <b>Cingulum_Post_R</b>      | Posterior cingulate gyrus                 | PCG.R        | region36            |
| <b>Hippocampus_L</b>        | Hippocampus                               | HIP.L        | region37            |
| <b>Hippocampus_R</b>        | Hippocampus                               | HIP.R        | region38            |
| <b>ParaHippocampal_L</b>    | Parahippocampal gyrus                     | PHG.L        | region39            |
| <b>ParaHippocampal_R</b>    | Parahippocampal gyrus                     | PHG.R        | region40            |
| <b>Amygdala_L</b>           | Amygdala                                  | AMYG.L       | region41            |
| <b>Amygdala_R</b>           | Amygdala                                  | AMYG.R       | region42            |
| <b>Calcarine_L</b>          | Calcarine fissure and surrounding cortex  | CAL.L        | region43            |
| <b>Calcarine_R</b>          | Calcarine fissure and surrounding cortex  | CAL.R        | region44            |
| <b>Cuneus_L</b>             | Cuneus                                    | CUN.L        | region45            |
| <b>Cuneus_R</b>             | Cuneus                                    | CUN.R        | region46            |
| <b>Lingual_L</b>            | Lingual gyrus                             | LING.L       | region47            |
| <b>Lingual_R</b>            | Lingual gyrus                             | LING.R       | region48            |
| <b>Occipital_Sup_L</b>      | Superior occipital gyrus                  | SOG.L        | region49            |
| <b>Occipital_Sup_R</b>      | Superior occipital gyrus                  | SOG.R        | region50            |

**Table S1.** Full names of brain AAL atlas regions (continued).

| <b>Regions</b>              | <b>Regions</b>                                        | <b>abbr.</b> | <b>regionLabels</b> |
|-----------------------------|-------------------------------------------------------|--------------|---------------------|
| <b>Occipital_Mid_L</b>      | Middle occipital gyrus                                | MOG.L        | region51            |
| <b>Occipital_Mid_R</b>      | Middle occipital gyrus                                | MOG.R        | region52            |
| <b>Occipital_Inf_L</b>      | Inferior occipital gyrus                              | IOG.L        | region53            |
| <b>Occipital_Inf_R</b>      | Inferior occipital gyrus                              | IOG.R        | region54            |
| <b>Fusiform_L</b>           | Fusiform gyrus                                        | FFG.L        | region55            |
| <b>Fusiform_R</b>           | Fusiform gyrus                                        | FFG.R        | region56            |
| <b>Postcentral_L</b>        | Postcentral gyrus                                     | PoCG.L       | region57            |
| <b>Postcentral_R</b>        | Postcentral gyrus                                     | PoCG.R       | region58            |
| <b>Parietal_Sup_L</b>       | Superior parietal gyrus                               | SPG.L        | region59            |
| <b>Parietal_Sup_R</b>       | Superior parietal gyrus                               | SPG.R        | region60            |
| <b>Parietal_Inf_L</b>       | Inferior parietal; but supramarginal and angular gyri | IPL.L        | region61            |
| <b>Parietal_Inf_R</b>       | Inferior parietal; but supramarginal and angular gyri | IPL.R        | region62            |
| <b>SupraMarginal_L</b>      | Supramarginal gyrus                                   | SMG.L        | region63            |
| <b>SupraMarginal_R</b>      | Supramarginal gyrus                                   | SMG.R        | region64            |
| <b>Angular_L</b>            | Angular gyrus                                         | ANG.L        | region65            |
| <b>Angular_R</b>            | Angular gyrus                                         | ANG.R        | region66            |
| <b>Precuneus_L</b>          | Precuneus                                             | PCUN.L       | region67            |
| <b>Precuneus_R</b>          | Precuneus                                             | PCUN.R       | region68            |
| <b>Paracentral_Lobule_L</b> | Paracentral lobule                                    | PCL.L        | region69            |
| <b>Paracentral_Lobule_R</b> | Paracentral lobule                                    | PCL.R        | region70            |
| <b>Caudate_L</b>            | Caudate nucleus                                       | CAU.L        | region71            |
| <b>Caudate_R</b>            | Caudate nucleus                                       | CAU.R        | region72            |
| <b>Putamen_L</b>            | Lenticular nucleus; putamen                           | PUT.L        | region73            |
| <b>Putamen_R</b>            | Lenticular nucleus; putamen                           | PUT.R        | region74            |
| <b>Pallidum_L</b>           | Lenticular nucleus; pallidum                          | PAL.L        | region75            |
| <b>Pallidum_R</b>           | Lenticular nucleus; pallidum                          | PAL.R        | region76            |
| <b>Thalamus_L</b>           | Thalamus                                              | THA.L        | region77            |
| <b>Thalamus_R</b>           | Thalamus                                              | THA.R        | region78            |
| <b>Heschl_L</b>             | Heschl gyrus                                          | HES.L        | region79            |
| <b>Heschl_R</b>             | Heschl gyrus                                          | HES.R        | region80            |
| <b>Temporal_Sup_L</b>       | Superior temporal gyrus                               | STG.L        | region81            |
| <b>Temporal_Sup_R</b>       | Superior temporal gyrus                               | STG.R        | region82            |
| <b>Temporal_Pole_Sup_L</b>  | Temporal pole: superior temporal gyrus                | TPOsup.L     | region83            |
| <b>Temporal_Pole_Sup_R</b>  | Temporal pole: superior temporal gyrus                | TPOsup.R     | region84            |
| <b>Temporal_Mid_L</b>       | Middle temporal gyrus                                 | MTG.L        | region85            |
| <b>Temporal_Mid_R</b>       | Middle temporal gyrus                                 | MTG.R        | region86            |
| <b>Temporal_Pole_Mid_L</b>  | Temporal pole: middle temporal gyrus                  | TPOmid.L     | region87            |
| <b>Temporal_Pole_Mid_R</b>  | Temporal pole: middle temporal gyrus                  | TPOmid.R     | region88            |
| <b>Temporal_Inf_L</b>       | Inferior temporal gyrus                               | ITG.L        | region89            |
| <b>Temporal_Inf_R</b>       | Inferior temporal gyrus                               | ITG.R        | region90            |

**Table S2.** Top 20 Spearman association results of the change in global network metrics with targeted Alzheimer’s Disease gene expressions. Threshold= $\frac{0.5}{17} = 0.0029$

| Gene   | Results are sorted according to p-value |         |                |
|--------|-----------------------------------------|---------|----------------|
|        | $\rho$                                  | P-value | Global Feature |
| PAXIP1 | 0.3889                                  | 0.0069  | transitivity   |
| PLAU   | -0.3824                                 | 0.008   | global_eff     |
| ACE    | -0.3696                                 | 0.0106  | transitivity   |
| PLAU   | -0.3523                                 | 0.0151  | char_path_len  |
| ABCA7  | -0.3492                                 | 0.0161  | char_path_len  |
| PSEN1  | -0.299                                  | 0.0412  | transitivity   |
| APP    | -0.2602                                 | 0.0774  | char_path_len  |
| PLAU   | -0.2542                                 | 0.0847  | louvain        |
| APOE   | -0.2506                                 | 0.0893  | char_path_len  |
| ADAM10 | -0.2365                                 | 0.1095  | louvain        |
| ACE    | 0.2291                                  | 0.1213  | louvain        |
| NOS3   | -0.2207                                 | 0.1359  | char_path_len  |
| NOS3   | -0.2202                                 | 0.1369  | global_eff     |
| ABCA7  | -0.2164                                 | 0.1441  | global_eff     |
| HFE    | -0.2012                                 | 0.1752  | char_path_len  |

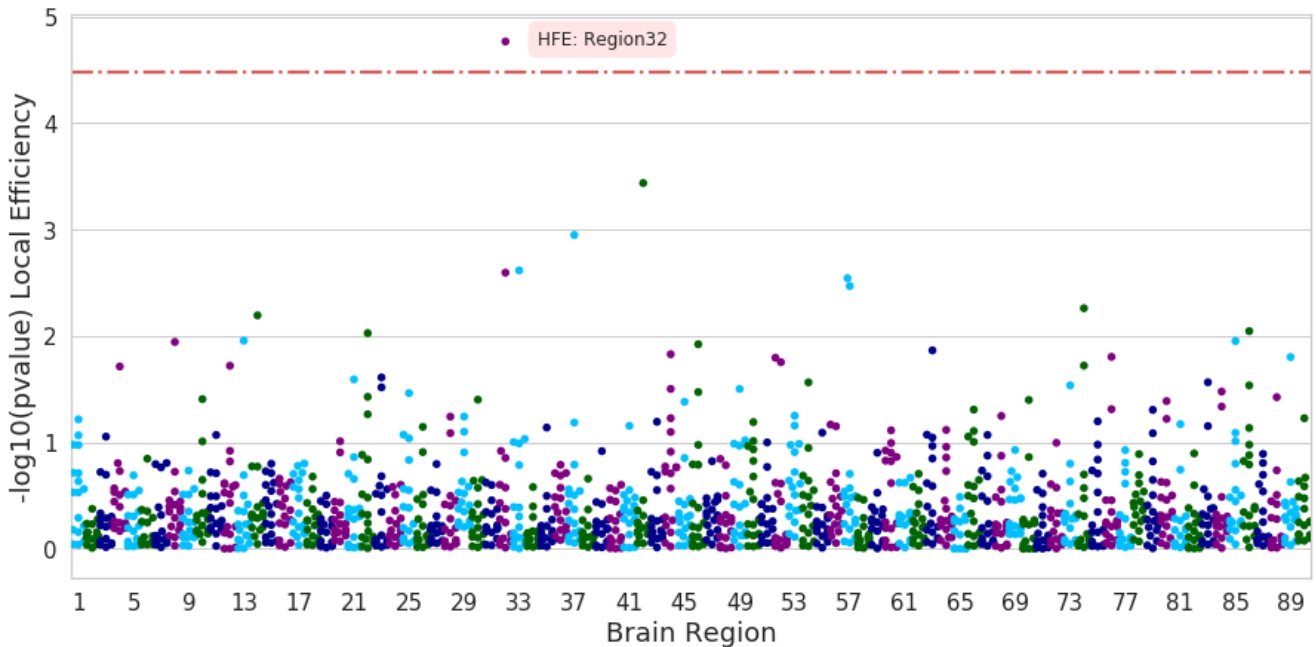

**Figure S8.** The figure shows the quantile regression model coefficient  $-\log_{10}$ p-values. The model regresses the change in the local coefficient (dependant variable) on a single gene at a time (independent variable), at each of the 90 brain regions as in the AAL atlas (x axis).

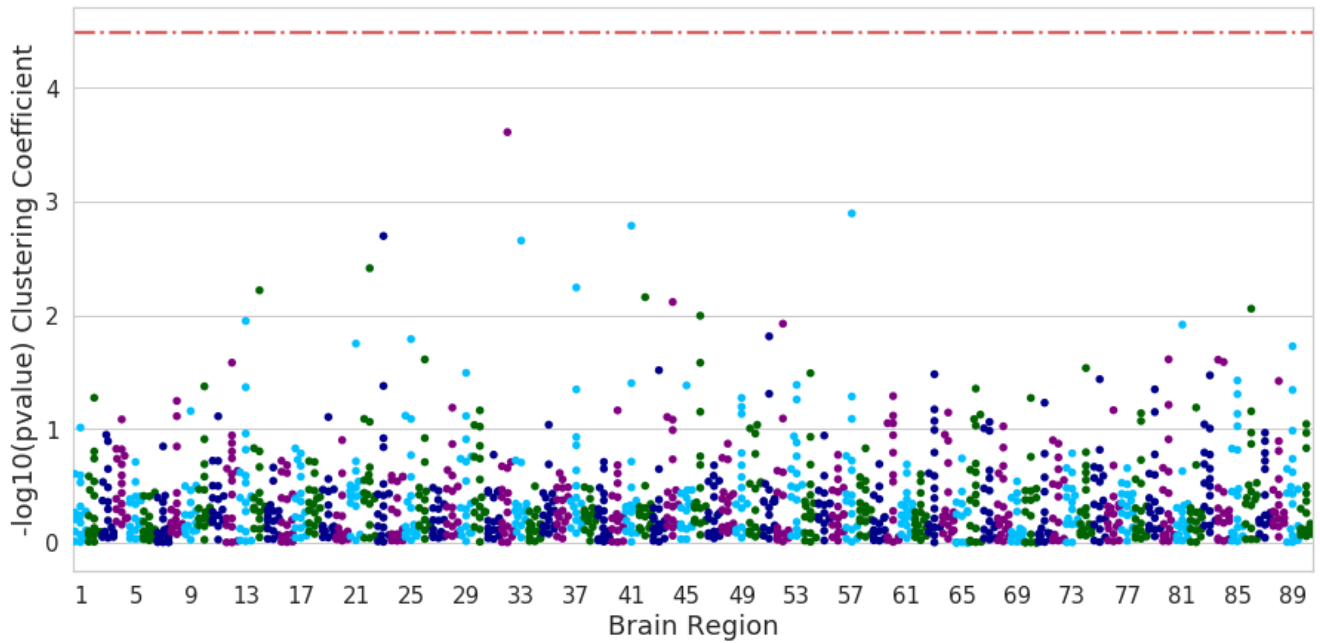

**Figure S9.** The figure shows the quantile regression model coefficient  $-\log_{10}$ p-values. The model regresses the change in the betweenness centrality (dependant variable) on a single gene at a time (independent variable), at each of the 90 brain regions as in the AAL atlas (x axis).

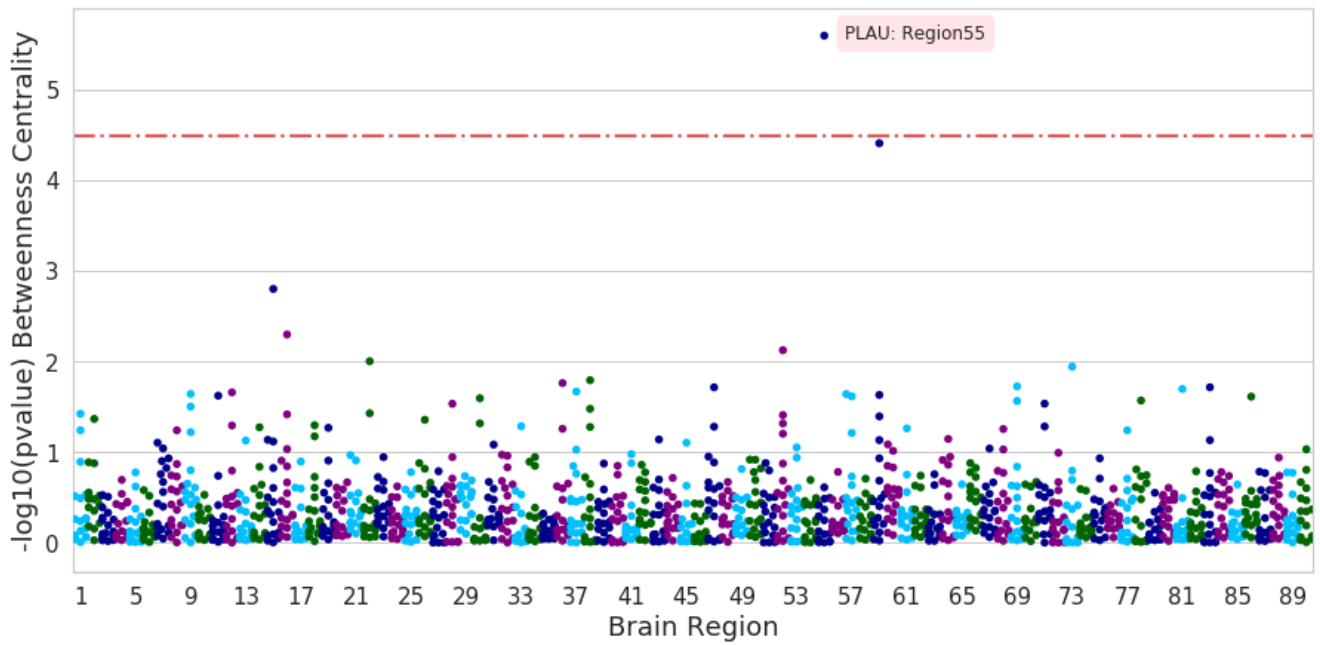

**Figure S10.** The figure shows the quantile regression model coefficient  $-\log_{10}$ p-values. The model regresses the change in the local coefficient (dependant variable) on a single gene at a time (independent variable), at each of the 90 brain regions as in the AAL atlas (x axis).

**Table S3.** Top quantile regression results of the change in global network metrics and targeted Alzheimer’s Disease gene expressions. Threshold=  $\frac{0.5}{17} = 0.0029$ .

| Gene   | Results are sorted according to p-value |           |          |               |
|--------|-----------------------------------------|-----------|----------|---------------|
|        | Beta                                    | Statistic | P-value  | Metric        |
| PAXIP1 | 0.0155                                  | 2.1179    | 0.039738 | transitivity  |
| PSEN1  | -0.0366                                 | -2.0821   | 0.04305  | transitivity  |
| A2M    | 0.0178                                  | 1.9728    | 0.054679 | louvain       |
| PLAU   | -0.0157                                 | -1.9288   | 0.06008  | global_eff    |
| APBB2  | 0.0166                                  | 1.7579    | 0.085573 | louvain       |
| ABCA7  | 0.0077                                  | 1.5185    | 0.135881 | transitivity  |
| BLMH   | 0.0101                                  | 1.3476    | 0.184529 | transitivity  |
| ACE    | -0.0162                                 | -1.2618   | 0.213524 | transitivity  |
| ADAM10 | -0.0147                                 | -1.2538   | 0.21638  | louvain       |
| APOE   | -0.0555                                 | -1.1673   | 0.249246 | char_path_len |
| PLD3   | -0.0096                                 | -1.1433   | 0.258978 | transitivity  |
| ABCA7  | -0.0156                                 | -1.1367   | 0.261684 | char_path_len |
| SORL1  | 0.0147                                  | 1.1278    | 0.265372 | transitivity  |
| APOE   | -0.0099                                 | -1.1048   | 0.275101 | global_eff    |
| HFE    | -0.0161                                 | -1.0436   | 0.302239 | louvain       |

**Table S4.** Quantile regression results of the difference in CDR (y) with the difference in global connectivity (x)

| Global Metric                                      | Threshold = $\frac{0.05}{6} = 0.00833$ . * represents significant p-value. |                    |                    |                    |                    |                   |  |
|----------------------------------------------------|----------------------------------------------------------------------------|--------------------|--------------------|--------------------|--------------------|-------------------|--|
|                                                    | CDMEMORY                                                                   | CDORIENT           | CDJUDGE            | CDCOMMUN           | CDHOME             | CD CARE           |  |
| <b>Q. Regression: <math>\beta</math> (p-value)</b> |                                                                            |                    |                    |                    |                    |                   |  |
| transitivity                                       | -6.14e-06 (0.0034*)                                                        | -1.8e-06 (nan)     | -3.2e-07 (nan)     | 8.4e-07 (0.9249)   | 4.13e-06 (0.7324)  | -3.1e-07 (nan)    |  |
| global_eff                                         | 1.3e-06 (0.8572)                                                           | 3.36e-06 (0.9944)  | 3.5e-07 (0.9826)   | 3.09e-06 (0.3131)  | 9.5e-06 (0.1613)   | -2.5e-07 (nan)    |  |
| louvain                                            | -2.64e-06 (0.1683)                                                         | -6.84e-06 (0.0352) | 1.21e-06 (0.0012*) | -1.01e-06 (0.8125) | -2.16e-06 (0.9424) | -6.3e-07 (0.1787) |  |
| char_path_len                                      | -5.8e-07 (0.8562)                                                          | -8.3e-07 (0.8791)  | -8e-08 (0.8637)    | -8.3e-07 (0.0361)  | -2.14e-06 (0.0442) | -2e-08 (nan)      |  |
| <b>Spearman: <math>\rho</math> (p-value)</b>       |                                                                            |                    |                    |                    |                    |                   |  |
| transitivity                                       | -0.3395 (0.021)                                                            | -0.0763 (0.6142)   | -0.0618 (0.6835)   | 0.0661 (0.6623)    | 0.161 (0.2851)     | -0.0081 (0.9574)  |  |
| global_eff                                         | 0.0483 (0.7497)                                                            | 0.0056 (0.9707)    | 0.0505 (0.7388)    | 0.2685 (0.0712)    | 0.4145 (0.0042*)   | -0.0263 (0.8625)  |  |
| louvain                                            | -0.1955 (0.1928)                                                           | -0.3119 (0.0349)   | 0.2077 (0.166)     | -0.0968 (0.522)    | -0.11 (0.4666)     | -0.0628 (0.6784)  |  |
| char_path_len                                      | -0.1183 (0.4337)                                                           | -0.0516 (0.7333)   | -0.0281 (0.8531)   | -0.2909 (0.0498)   | -0.3811 (0.009)    | -0.0065 (0.9658)  |  |

**Table S5.** Quantile regression top results of regressing CDR scores on the local connectivity metrics.

| CDR      | Results are sorted according to p-value. Threshold = $\frac{0.05}{6 \times 90} = 9.26e - 05$ |                      |           |             |            |
|----------|----------------------------------------------------------------------------------------------|----------------------|-----------|-------------|------------|
|          | Metric                                                                                       | Region               | Region id | $\beta$     | P-value    |
| CDJUDGE  | betweencentrality                                                                            | Frontal_Inf_Oper_L   | region11  | -1.06e-08   | 1.3246e-17 |
| CDCOMMUN | betweencentrality                                                                            | Frontal_Inf_Tri_L    | region13  | 1.162e-07   | 1.0377e-16 |
| CDCOMMUN | betweencentrality                                                                            | Pallidum_R           | region76  | 6.79e-08    | 1.5932e-16 |
| CDCARE   | betweencentrality                                                                            | Pallidum_R           | region76  | 1.21e-08    | 2.5409e-15 |
| CDCARE   | betweencentrality                                                                            | Frontal_Inf_Tri_L    | region13  | -2.35e-08   | 4.3817e-15 |
| CDCARE   | betweencentrality                                                                            | Rolandic_Oper_R      | region18  | -5e-09      | 5.5180e-14 |
| CDCARE   | betweencentrality                                                                            | Frontal_Mid_Orb_L    | region9   | 8.35e-08    | 6.8455e-14 |
| CDCARE   | betweencentrality                                                                            | Frontal_Inf_Tri_R    | region14  | 1.538e-07   | 4.6868e-13 |
| CDMEMORY | betweencentrality                                                                            | Pallidum_R           | region76  | 9.8e-09     | 1.8588e-12 |
| CDMEMORY | betweencentrality                                                                            | Heschl_R             | region80  | -1.431e-07  | 7.9135e-12 |
| CDHOME   | betweencentrality                                                                            | Pallidum_R           | region76  | 2.34e-08    | 1.0339e-10 |
| CDORIENT | betweencentrality                                                                            | Rolandic_Oper_R      | region18  | 3.566e-07   | 2.8690e-10 |
| CDCOMMUN | betweencentrality                                                                            | Frontal_Sup_Medial_L | region23  | 1.2e-08     | 2.2249e-09 |
| CDMEMORY | betweencentrality                                                                            | Frontal_Mid_Orb_L    | region9   | 1.53e-08    | 2.7792e-09 |
| CDHOME   | betweencentrality                                                                            | Frontal_Inf_Tri_L    | region13  | 7.55e-08    | 2.8144e-09 |
| CDCARE   | local_eff                                                                                    | Parietal_Sup_L       | region59  | -2.8362e-06 | 4.5150e-09 |
| CDCARE   | betweencentrality                                                                            | Caudate_R            | region72  | -2.7e-09    | 5.9383e-08 |
| CDCARE   | betweencentrality                                                                            | Frontal_Sup_Medial_L | region23  | 1.81e-08    | 8.4091e-08 |
| CDCOMMUN | betweencentrality                                                                            | Precentral_L         | region1   | 5.6e-09     | 8.8635e-08 |
| CDCARE   | betweencentrality                                                                            | Frontal_Sup_Orb_L    | region5   | -6.8e-09    | 9.1463e-08 |
| CDCARE   | betweencentrality                                                                            | Occipital_Inf_L      | region53  | 3.2e-09     | 1.0397e-07 |
| CDJUDGE  | betweencentrality                                                                            | Insula_R             | region30  | -1.9e-09    | 1.0927e-07 |
| CDORIENT | betweencentrality                                                                            | Angular_R            | region66  | -2.58e-08   | 1.3192e-07 |
| CDHOME   | betweencentrality                                                                            | Frontal_Sup_Medial_L | region23  | 7.28e-08    | 1.4609e-07 |
| CDMEMORY | betweencentrality                                                                            | Angular_L            | region65  | 9.69e-08    | 1.5599e-07 |
| CDCOMMUN | betweencentrality                                                                            | Occipital_Inf_L      | region53  | 8e-09       | 1.6902e-07 |
| CDCOMMUN | betweencentrality                                                                            | Occipital_Sup_R      | region50  | 8.8e-09     | 1.8204e-07 |
| CDCARE   | betweencentrality                                                                            | Cingulum_Post_R      | region36  | 3.55e-08    | 2.6603e-07 |
| CDCARE   | betweencentrality                                                                            | Angular_L            | region65  | 5.9e-09     | 3.2401e-07 |
| CDCARE   | betweencentrality                                                                            | Frontal_Inf_Oper_R   | region12  | -4.9e-09    | 3.9313e-07 |
| CDMEMORY | betweencentrality                                                                            | Frontal_Inf_Oper_R   | region12  | 1.72e-08    | 4.2464e-07 |
| CDJUDGE  | betweencentrality                                                                            | Precentral_R         | region2   | 2.4e-09     | 4.2576e-07 |
| CDJUDGE  | betweencentrality                                                                            | Paracentral_Lobule_R | region70  | 5.1e-09     | 4.5211e-07 |
| CDCARE   | local_eff                                                                                    | Caudate_L            | region71  | 7.203e-07   | 6.0570e-07 |
| CDMEMORY | betweencentrality                                                                            | Occipital_Mid_R      | region52  | -1.45e-08   | 7.3061e-07 |
| CDJUDGE  | betweencentrality                                                                            | SupraMarginal_R      | region64  | -1.35e-08   | 7.3933e-07 |
| CDJUDGE  | betweencentrality                                                                            | Calcarine_L          | region43  | 1.2e-09     | 8.0399e-07 |
| CDCARE   | betweencentrality                                                                            | Precentral_L         | region1   | 3.9e-09     | 1.0015e-06 |
| CDCARE   | local_eff                                                                                    | Thalamus_R           | region78  | -1.6719e-06 | 1.1912e-06 |
| CDCARE   | betweencentrality                                                                            | ParaHippocampal_L    | region39  | 8.1e-09     | 1.2821e-06 |
| CDMEMORY | betweencentrality                                                                            | Precentral_L         | region1   | 4.9e-09     | 1.4549e-06 |
| CDJUDGE  | betweencentrality                                                                            | Cingulum_Mid_L       | region33  | 5e-10       | 1.8206e-06 |
| CDORIENT | betweencentrality                                                                            | Amygdala_R           | region42  | 2.7e-08     | 2.0376e-06 |
| CDCARE   | betweencentrality                                                                            | Cuneus_R             | region46  | 2.6e-09     | 2.1374e-06 |
| CDJUDGE  | local_eff                                                                                    | Occipital_Mid_L      | region51  | -1.3593e-06 | 2.5568e-06 |
| CDCARE   | betweencentrality                                                                            | Occipital_Sup_R      | region50  | 2.4e-09     | 2.7811e-06 |
| CDCARE   | betweencentrality                                                                            | SupraMarginal_R      | region64  | 2.35e-08    | 2.8475e-06 |
| CDCARE   | cluster_coef                                                                                 | Parietal_Sup_L       | region59  | -1.5812e-06 | 3.0162e-06 |
| CDCARE   | betweencentrality                                                                            | Precentral_R         | region2   | 6.4e-09     | 3.0711e-06 |
| CDJUDGE  | betweencentrality                                                                            | Cuneus_R             | region46  | 8e-10       | 3.1560e-06 |

**Table S5.** Quantile regression top results of regressing CDR scores on the local connectivity metrics (continued).

| CDR      | Results are sorted according to p-value. Threshold = $\frac{0.05}{6 \times 90} = 9.26e - 05$ |                      |           |             |            |
|----------|----------------------------------------------------------------------------------------------|----------------------|-----------|-------------|------------|
|          | Metric                                                                                       | Region               | Region id | $\beta$     | P-value    |
| CDMEMORY | betweencentrality                                                                            | Precentral_R         | region2   | 1.21e-08    | 4.0628e-06 |
| CDCARE   | betweencentrality                                                                            | Occipital_Mid_L      | region51  | -2e-09      | 4.7259e-06 |
| CDCARE   | betweencentrality                                                                            | Temporal_Inf_R       | region90  | -8e-10      | 5.1879e-06 |
| CDCOMMUN | betweencentrality                                                                            | Temporal_Pole_Sup_R  | region84  | 1.7e-09     | 5.2490e-06 |
| CDCARE   | local_eff                                                                                    | Paracentral_Lobule_R | region70  | 4.028e-07   | 5.3093e-06 |
| CDCARE   | betweencentrality                                                                            | Olfactory_R          | region22  | 2.5e-09     | 6.1963e-06 |
| CDCARE   | betweencentrality                                                                            | Pallidum_L           | region75  | 2.8e-09     | 6.6154e-06 |
| CDJUDGE  | betweencentrality                                                                            | Postcentral_L        | region57  | -4e-10      | 6.6330e-06 |
| CDCARE   | betweencentrality                                                                            | Frontal_Med_Orb_L    | region25  | -5.5e-09    | 6.7257e-06 |
| CDCARE   | betweencentrality                                                                            | Parietal_Inf_L       | region61  | -7.6e-09    | 6.8700e-06 |
| CDCARE   | local_eff                                                                                    | Calcarine_L          | region43  | -1.3701e-06 | 6.9599e-06 |
| CDCARE   | betweencentrality                                                                            | Cingulum_Mid_L       | region33  | 9e-10       | 7.0795e-06 |
| CDHOME   | betweencentrality                                                                            | Precentral_L         | region1   | 6.5e-09     | 7.2322e-06 |
| CDJUDGE  | cluster_coef                                                                                 | Occipital_Mid_L      | region51  | -7.789e-07  | 7.5340e-06 |
| CDCARE   | betweencentrality                                                                            | Olfactory_L          | region21  | 1.2e-09     | 1.0177e-05 |
| CDCARE   | betweencentrality                                                                            | Paracentral_Lobule_L | region69  | 2.9e-09     | 1.0179e-05 |
| CDORIENT | betweencentrality                                                                            | Frontal_Sup_Medial_L | region23  | 4.18e-08    | 1.1987e-05 |
| CDCARE   | cluster_coef                                                                                 | Thalamus_R           | region78  | -9.55e-07   | 1.2007e-05 |
| CDMEMORY | betweencentrality                                                                            | Frontal_Sup_Orb_L    | region5   | -2.3e-09    | 1.3418e-05 |
| CDCARE   | betweencentrality                                                                            | Frontal_Sup_Medial_R | region24  | -2.2e-09    | 1.3753e-05 |
| CDMEMORY | betweencentrality                                                                            | Thalamus_L           | region77  | 4.6e-09     | 1.4079e-05 |
| CDCARE   | betweencentrality                                                                            | Putamen_R            | region74  | -6.6e-09    | 1.4768e-05 |
| CDCOMMUN | betweencentrality                                                                            | Putamen_R            | region74  | -1.1e-09    | 1.7248e-05 |
| CDCARE   | local_eff                                                                                    | Amygdala_R           | region42  | -1.2503e-06 | 1.7740e-05 |
| CDCARE   | betweencentrality                                                                            | Thalamus_L           | region77  | -7e-10      | 1.7820e-05 |
| CDJUDGE  | betweencentrality                                                                            | Frontal_Inf_Orb_R    | region16  | 6e-10       | 1.7857e-05 |
| CDJUDGE  | cluster_coef                                                                                 | Temporal_Mid_L       | region85  | 6.814e-07   | 1.7954e-05 |
| CDJUDGE  | betweencentrality                                                                            | Pallidum_L           | region75  | 6e-10       | 1.9036e-05 |
| CDCARE   | local_eff                                                                                    | Lingual_L            | region47  | -1.3648e-06 | 1.9534e-05 |
| CDCARE   | betweencentrality                                                                            | Putamen_L            | region73  | -9e-10      | 2.0543e-05 |
| CDCARE   | local_eff                                                                                    | Frontal_Mid_Orb_L    | region9   | -9.801e-07  | 2.0693e-05 |
| CDJUDGE  | local_eff                                                                                    | Temporal_Mid_L       | region85  | 1.1769e-06  | 2.4200e-05 |
| CDJUDGE  | cluster_coef                                                                                 | Frontal_Sup_Orb_L    | region5   | 5.54e-07    | 2.5902e-05 |
| CDCARE   | betweencentrality                                                                            | Temporal_Pole_Sup_L  | region83  | -2.4e-09    | 2.7526e-05 |
| CDJUDGE  | local_eff                                                                                    | Calcarine_L          | region43  | -5.122e-07  | 2.7953e-05 |
| CDJUDGE  | cluster_coef                                                                                 | Cuneus_R             | region46  | -6.206e-07  | 2.8360e-05 |
| CDCARE   | betweencentrality                                                                            | Frontal_Med_Orb_R    | region26  | 1.1e-09     | 2.9931e-05 |
| CDCARE   | betweencentrality                                                                            | Rectus_L             | region27  | 1.7e-09     | 3.1086e-05 |
| CDCARE   | betweencentrality                                                                            | Temporal_Pole_Sup_R  | region84  | 4e-10       | 3.2473e-05 |
| CDCARE   | local_eff                                                                                    | Precentral_R         | region2   | -1.7287e-06 | 3.3132e-05 |
| CDJUDGE  | local_eff                                                                                    | Frontal_Sup_Orb_L    | region5   | 7.069e-07   | 3.3295e-05 |
| CDCARE   | cluster_coef                                                                                 | Precuneus_L          | region67  | -1.3847e-06 | 3.3801e-05 |
| CDJUDGE  | cluster_coef                                                                                 | Olfactory_L          | region21  | 3.541e-07   | 3.5295e-05 |
| CDCARE   | cluster_coef                                                                                 | Occipital_Sup_L      | region49  | -1.2676e-06 | 3.5428e-05 |
| CDJUDGE  | cluster_coef                                                                                 | Calcarine_L          | region43  | -4.54e-07   | 3.7033e-05 |
| CDJUDGE  | local_eff                                                                                    | Cuneus_R             | region46  | -1.0686e-06 | 3.7315e-05 |
| CDCARE   | local_eff                                                                                    | Occipital_Sup_L      | region49  | -2.3923e-06 | 3.9588e-05 |
| CDCOMMUN | betweencentrality                                                                            | Frontal_Sup_Orb_R    | region6   | 1e-09       | 4.0230e-05 |
| CDCARE   | betweencentrality                                                                            | Rolandic_Oper_L      | region17  | 6.2e-08     | 4.0397e-05 |



**Table S5.** Quantile regression top results of regressing CDR scores on the local connectivity metrics (continued).

| CDR             | Results are sorted according to p-value. Threshold = $\frac{0.05}{6 \times 90} = 9.26e - 05$ |                      |           |              |            |
|-----------------|----------------------------------------------------------------------------------------------|----------------------|-----------|--------------|------------|
|                 | Metric                                                                                       | Region               | Region id | $\beta$      | P-value    |
| <b>CDJUDGE</b>  | betweencentrality                                                                            | Insula_L             | region29  | 2e-10        | 4.3809e-05 |
| <b>CDR_diff</b> | betweencentrality                                                                            | Frontal_Sup_Medial_L | region23  | 0.0037021312 | 4.5916e-05 |
| <b>CDCOMMUN</b> | cluster_coef                                                                                 | Precuneus_L          | region67  | -1.9329e-06  | 4.9971e-05 |
| <b>CDCARE</b>   | local_eff                                                                                    | Occipital_Mid_L      | region51  | -1.4926e-06  | 5.3963e-05 |
| <b>CDCARE</b>   | betweencentrality                                                                            | Temporal_Inf_L       | region89  | 2e-10        | 5.5267e-05 |
| <b>CDCARE</b>   | betweencentrality                                                                            | Amygdala_L           | region41  | -1.1e-09     | 5.6693e-05 |
| <b>CDCARE</b>   | betweencentrality                                                                            | Frontal_Inf_Orb_L    | region15  | -8e-10       | 5.6717e-05 |
| <b>CDJUDGE</b>  | betweencentrality                                                                            | Putamen_R            | region74  | 3e-10        | 5.8176e-05 |
| <b>CDCARE</b>   | local_eff                                                                                    | Parietal_Inf_L       | region61  | 1.8772e-06   | 5.9063e-05 |
| <b>CDORIENT</b> | local_eff                                                                                    | Caudate_L            | region71  | 2.6838e-06   | 5.9186e-05 |
| <b>CDCARE</b>   | local_eff                                                                                    | ParaHippocampal_L    | region39  | -6.989e-07   | 6.0628e-05 |
| <b>CDCARE</b>   | cluster_coef                                                                                 | Paracentral_Lobule_L | region69  | -3.682e-07   | 6.0769e-05 |
| <b>CDHOME</b>   | betweencentrality                                                                            | Cingulum_Mid_L       | region33  | 1.12e-08     | 6.2336e-05 |
| <b>CDCARE</b>   | local_eff                                                                                    | Temporal_Pole_Sup_R  | region84  | -2.5008e-06  | 6.4671e-05 |
| <b>CDCARE</b>   | betweencentrality                                                                            | Calcarine_R          | region44  | -2.3e-09     | 7.4457e-05 |
| <b>CDCARE</b>   | betweencentrality                                                                            | ParaHippocampal_R    | region40  | -1.2e-09     | 7.5724e-05 |
| <b>CDMEMORY</b> | local_eff                                                                                    | Temporal_Mid_L       | region85  | 4.7978e-06   | 7.5984e-05 |
| <b>CDORIENT</b> | betweencentrality                                                                            | Thalamus_L           | region77  | 3.7e-09      | 8.3093e-05 |
| <b>CDCARE</b>   | cluster_coef                                                                                 | Parietal_Inf_L       | region61  | 9.696e-07    | 8.3094e-05 |
| <b>CDCARE</b>   | betweencentrality                                                                            | Precuneus_L          | region67  | 1.3e-09      | 8.9269e-05 |
| <b>CDJUDGE</b>  | local_eff                                                                                    | Precentral_R         | region2   | -1.0795e-06  | 8.9400e-05 |
| <b>CDCOMMUN</b> | betweencentrality                                                                            | Cingulum_Mid_L       | region33  | 1.8e-09      | 8.9822e-05 |

**Table S6.** Ridge regression results of the change CDR scores on the global connectivity changes and Alzheimer's Disease gene expressions.

| CDR      |               | Metric | Alpha score | Metric  | APBB2MPO | APP     | ACE     | PLAU    | PAXIP1HFE | SORL1 A2M | NOS3    | BLMH    | ADAMI0PLD3 | APOE    | PSENI   | PSENI2  | ABCA7   |         |         |         |         |
|----------|---------------|--------|-------------|---------|----------|---------|---------|---------|-----------|-----------|---------|---------|------------|---------|---------|---------|---------|---------|---------|---------|---------|
| CDMEMORY | transitivity  | 0.1    | -0.0747     | -0.6704 | 0.122    | 0.0823  | 0.0248  | -0.0392 | -0.0556   | 0.0497    | -0.0926 | 0.0138  | -0.3465    | 0.3276  | -0.1321 | -0.1347 | -0.0774 | -0.2426 | 0.161   | -0.1369 | 0.1903  |
| CDMEMORY | global_eff    | 0.1    | -0.0753     | -0.0304 | 0.1114   | 0.0802  | 0.0332  | -0.0311 | -0.0575   | 0.06      | -0.0765 | 0.0086  | -0.3486    | 0.3226  | -0.1364 | -0.1318 | -0.0628 | -0.267  | 0.1585  | -0.1392 | 0.1919  |
| CDMEMORY | louvain       | 0.1    | -0.0754     | -0.259  | 0.1052   | 0.0823  | 0.0353  | -0.0259 | -0.0676   | 0.0647    | -0.0634 | 0.0098  | -0.3483    | 0.3178  | -0.1388 | -0.1296 | -0.0616 | -0.2694 | 0.1563  | -0.1373 | 0.1884  |
| CDMEMORY | char_path_len | 0.1    | -0.0752     | -0.1203 | 0.1004   | 0.0804  | 0.0351  | -0.0335 | -0.0617   | 0.0619    | -0.0769 | 0.0074  | -0.3507    | 0.3187  | -0.1365 | -0.1287 | -0.0475 | -0.2827 | 0.1621  | -0.1398 | 0.1869  |
| CDORIENT | transitivity  | 0.1    | -0.0677     | -0.3061 | 0.1731   | 0.0679  | 0.2135  | 0.0287  | 0.0046    | -0.0399   | -0.472  | 0.0156  | -0.192     | 0.0553  | -0.0138 | -0.0342 | -0.0135 | -0.1967 | 0.1309  | -0.232  | -0.0035 |
| CDORIENT | global_eff    | 0.1    | -0.0677     | -0.0517 | 0.169    | 0.067   | 0.2172  | 0.0324  | 0.0042    | -0.0354   | -0.4648 | 0.0133  | -0.1928    | 0.0532  | -0.0157 | -0.0332 | -0.0078 | -0.2068 | 0.1297  | -0.2331 | -0.0025 |
| CDORIENT | louvain       | 0.1    | -0.0673     | -0.403  | 0.1592   | 0.0702  | 0.2203  | 0.0406  | -0.0117   | -0.0281   | -0.4445 | 0.0151  | -0.1923    | 0.0457  | -0.0195 | -0.0298 | -0.0058 | -0.2107 | 0.1261  | -0.23   | -0.0079 |
| CDORIENT | char_path_len | 0.1    | -0.0677     | 0.009   | 0.1688   | 0.067   | 0.2173  | 0.0325  | 0.0039    | -0.0352   | -0.4645 | 0.0132  | -0.1929    | 0.0532  | -0.0158 | -0.033  | -0.0076 | -0.2071 | 0.1295  | -0.2331 | -0.0025 |
| CDJUDGE  | transitivity  | 149    | -0.0056     | -0.0    | -0.0002  | 0.0023  | -0.0007 | -0.0012 | 0.0       | 0.0019    | 0.0003  | 0.0002  | 0.0004     | 0.0002  | -0.0005 | -0.0002 | -0.0007 | -0.0003 | -0.0005 | -0.0001 | -0.0027 |
| CDJUDGE  | global_eff    | 149    | -0.0056     | 0.0     | -0.0002  | 0.0023  | -0.0007 | -0.0012 | 0.0       | 0.0019    | 0.0003  | 0.0002  | 0.0004     | 0.0002  | -0.0005 | -0.0002 | -0.0007 | -0.0003 | -0.0005 | -0.0001 | -0.0027 |
| CDJUDGE  | louvain       | 149    | -0.0056     | 0.0001  | -0.0002  | 0.0023  | -0.0007 | -0.0012 | 0.0       | 0.0019    | 0.0003  | 0.0002  | 0.0004     | 0.0002  | -0.0005 | -0.0002 | -0.0007 | -0.0003 | -0.0005 | -0.0001 | -0.0027 |
| CDJUDGE  | char_path_len | 149    | -0.0056     | -0.0001 | -0.0002  | 0.0023  | -0.0007 | -0.0012 | 0.0       | 0.0019    | 0.0003  | 0.0002  | 0.0004     | 0.0002  | -0.0005 | -0.0002 | -0.0007 | -0.0003 | -0.0005 | -0.0001 | -0.0027 |
| CDCOMMUN | transitivity  | 0.3    | -0.0325     | -0.0526 | 0.1227   | -0.0205 | -0.178  | 0.1151  | 0.1812    | -0.0161   | -0.0366 | -0.0375 | -0.1628    | 0.1476  | -0.0795 | 0.1688  | -0.0516 | 0.0563  | 0.0078  | -0.1135 | 0.0637  |
| CDCOMMUN | global_eff    | 0.3    | -0.0325     | 0.0071  | 0.1218   | -0.0207 | -0.1775 | 0.1154  | 0.1811    | -0.0155   | -0.0356 | -0.0378 | -0.1629    | 0.1473  | -0.0798 | 0.1692  | -0.0503 | 0.0547  | 0.0076  | -0.1137 | 0.0637  |
| CDCOMMUN | louvain       | 0.3    | -0.0325     | 0.0174  | 0.1223   | -0.0208 | -0.1776 | 0.1152  | 0.1817    | -0.0158   | -0.0363 | -0.0379 | -0.1629    | 0.1476  | -0.0797 | 0.169   | -0.0505 | 0.0548  | 0.0077  | -0.1138 | 0.064   |
| CDCOMMUN | char_path_len | 0.5    | -0.0324     | -0.0703 | 0.1038   | -0.0164 | -0.1436 | 0.0941  | 0.1423    | -0.0117   | -0.0184 | -0.0381 | -0.1579    | 0.1242  | -0.0666 | 0.1484  | -0.0458 | 0.0447  | 0.0139  | -0.1111 | 0.0613  |
| CDHOME   | transitivity  | 0.4    | -0.0893     | 0.0428  | 0.1908   | -0.0343 | -0.09   | 0.0756  | 0.0009    | -0.0142   | 0.0578  | -0.1228 | -0.1029    | -0.0044 | -0.1787 | 0.3326  | -0.095  | 0.1188  | 0.1113  | -0.3091 | 0.1076  |
| CDHOME   | global_eff    | 0.3    | -0.0891     | 0.0872  | 0.1961   | -0.0363 | -0.0987 | 0.0821  | -0.0017   | -0.0156   | 0.0521  | -0.132  | -0.1063    | -0.0057 | -0.1846 | 0.3515  | -0.0929 | 0.1258  | 0.1227  | -0.3232 | 0.1079  |
| CDHOME   | louvain       | 0.3    | -0.0892     | -0.0191 | 0.1972   | -0.0361 | -0.0989 | 0.0826  | -0.0017   | -0.0157   | 0.0525  | -0.1318 | -0.1059    | -0.0054 | -0.1847 | 0.3511  | -0.0949 | 0.1275  | 0.1225  | -0.3231 | 0.1082  |
| CDHOME   | char_path_len | 0.6    | -0.0891     | -0.1843 | 0.1674   | -0.0302 | -0.0767 | 0.0607  | 0.0025    | -0.0114   | 0.0616  | -0.1083 | -0.0978    | -0.0083 | -0.167  | 0.3047  | -0.0782 | 0.0932  | 0.1009  | -0.2832 | 0.0988  |
| CD CARE  | transitivity  | 149    | -0.1093     | -0.0    | -0.0008  | 0.0027  | -0.0014 | -0.0002 | 0.0007    | 0.0001    | -0.0037 | 0.0013  | -0.0066    | -0.001  | -0.0037 | -0.0018 | -0.0031 | 0.0     | 0.0013  | -0.0045 | 0.0078  |
| CD CARE  | global_eff    | 149    | -0.1093     | -0.0    | -0.0008  | 0.0027  | -0.0014 | -0.0002 | 0.0007    | 0.0001    | -0.0037 | 0.0013  | -0.0066    | -0.001  | -0.0037 | -0.0018 | -0.0031 | 0.0     | 0.0013  | -0.0045 | 0.0078  |
| CD CARE  | louvain       | 149    | -0.1093     | -0.0001 | -0.0008  | 0.0027  | -0.0014 | -0.0002 | 0.0007    | 0.0001    | -0.0037 | 0.0013  | -0.0066    | -0.001  | -0.0037 | -0.0018 | -0.0031 | 0.0     | 0.0013  | -0.0045 | 0.0078  |
| CD CARE  | char_path_len | 149    | -0.1093     | 0.0     | -0.0008  | 0.0027  | -0.0014 | -0.0002 | 0.0007    | 0.0001    | -0.0037 | 0.0013  | -0.0066    | -0.001  | -0.0037 | -0.0018 | -0.0031 | 0.0     | 0.0013  | -0.0045 | 0.0078  |
| CDR_diff | transitivity  | 0.1    | -1.2761     | -1.5541 | 0.7401   | 0.1734  | -0.2195 | 0.1158  | 0.197     | 0.0516    | -0.8229 | -0.0517 | -1.2177    | 0.8435  | -0.6461 | 0.3132  | -0.3519 | -0.337  | 0.6769  | -1.3473 | 0.6318  |
| CDR_diff | global_eff    | 0.1    | -1.2782     | 0.1652  | 0.7112   | 0.1687  | -0.1988 | 0.134   | 0.1901    | 0.0768    | -0.7842 | -0.0645 | -1.2239    | 0.8302  | -0.6564 | 0.3216  | -0.3117 | -0.3999 | 0.6719  | -1.353  | 0.634   |
| CDR_diff | louvain       | 0.1    | -1.28       | -0.4664 | 0.7041   | 0.1724  | -0.1962 | 0.1439  | 0.1741    | 0.084     | -0.762  | -0.0618 | -1.2221    | 0.823   | -0.6605 | 0.3239  | -0.3153 | -0.3984 | 0.6672  | -1.3492 | 0.6292  |
| CDR_diff | char_path_len | 0.1    | -1.2776     | -1.0277 | 0.6252   | 0.1706  | -0.1849 | 0.1144  | 0.1581    | 0.0904    | -0.7903 | -0.0733 | -1.2397    | 0.8002  | -0.6563 | 0.3454  | -0.1921 | -0.5225 | 0.7013  | -1.3571 | 0.5943  |
